# Supplementary material
Source: PubMed Central journal article supplement (PMC3489174)
Supplement: NIHMS409772-supplement-1.pdf [file NIHMS409772-supplement-1.pdf]

**Electronic supplementary material**

**ESM Table 1** Cox proportional hazards analysis for the association between both Lp-PLA2 mass and activity, and incident CVD outcomes, stratified by type 2 diabetes status

| Variable per outcome          | No diabetes              |                    |                              |                    | Diabetes                 |                    |                              |                    |
|-------------------------------|--------------------------|--------------------|------------------------------|--------------------|--------------------------|--------------------|------------------------------|--------------------|
|                               | Lp-PLA <sub>2</sub> mass |                    | Lp-PLA <sub>2</sub> activity |                    | Lp-PLA <sub>2</sub> mass |                    | Lp-PLA <sub>2</sub> activity |                    |
|                               | ≤75th <sup>a</sup>       | >75th <sup>a</sup> | ≤75th <sup>a</sup>           | >75th <sup>a</sup> | ≤75th <sup>a</sup>       | >75th <sup>a</sup> | ≤75th <sup>a</sup>           | >75th <sup>a</sup> |
| <b>Fatal CHD</b>              |                          |                    |                              |                    |                          |                    |                              |                    |
| Events ( <i>n</i> )           | 271                      | 107                | 271                          | 107                | 84                       | 34                 | 82                           | 36                 |
| Person-years                  | 34807                    | 10786              | 34753                        | 10841              | 4357                     | 1347               | 4011                         | 1694               |
| Adjusted HR <sup>b</sup>      | 1.0                      | 1.17 (0.93–1.96)   | 1.0                          | 1.16 (0.92–1.46)   | 1.0                      | 1.36 (0.90–2.06)   | 1.0                          | 1.09 (0.73–1.63)   |
| Multivariable HR <sup>c</sup> | 1.0                      | 1.07 (0.84–1.37)   | 1.0                          | 1.16 (0.90–1.50)   | 1.0                      | 1.37 (0.87–2.17)   | 1.0                          | 1.08 (0.67–1.72)   |
| <b>Fatal MI</b>               |                          |                    |                              |                    |                          |                    |                              |                    |
| Events ( <i>n</i> )           | 39                       | 12                 | 39                           | 12                 | 12                       | 3                  | 11                           | 4                  |
| Person-years                  | 35230                    | 10974              | 35184                        | 11019              | 4524                     | 1431               | 4162                         | 1792               |
| Adjusted HR <sup>b</sup>      | 1.0                      | 0.89 (0.46–1.70)   | 1.0                          | 0.88 (0.45–1.71)   | 1.0                      | 0.77 (0.21–2.81)   | 1.0                          | 0.89 (0.28–2.86)   |
| Multivariable HR <sup>c</sup> | 1.0                      | 0.73 (0.36–1.47)   | 1.0                          | 0.74 (0.35–1.53)   | 1.0                      | 0.56 (0.13–2.50)   | 1.0                          | 0.68 (0.16–2.93)   |
| <b>Nonfatal MI</b>            |                          |                    |                              |                    |                          |                    |                              |                    |
| Events ( <i>n</i> )           | 284                      | 130                | 285                          | 129                | 67                       | 28                 | 68                           | 27                 |
| Person-years                  | 33916                    | 10335              | 33908                        | 10343              | 4280                     | 1295               | 3918                         | 1657               |
| Adjusted HR <sup>b</sup>      | 1.0                      | 1.44 (1.17–1.78)   | 1.0                          | 1.35 (1.09–1.67)   | 1.0                      | 1.32 (0.84–2.08)   | 1.0                          | 0.90 (0.57–1.41)   |
| Multivariable HR <sup>c</sup> | 1.0                      | 1.48 (1.19–1.85)   | 1.0                          | 1.28 (1.01–1.62)   | 1.0                      | 1.49 (0.88–2.54)   | 1.0                          | 1.03 (0.60–1.77)   |
| <b>CHF</b>                    |                          |                    |                              |                    |                          |                    |                              |                    |
| Events ( <i>n</i> )           | 602                      | 224                | 610                          | 216                | 141                      | 54                 | 142                          | 53                 |
| Person-years                  | 33135                    | 10224              | 33052                        | 10308              | 3986                     | 1208               | 3638                         | 1556               |
| Adjusted HR <sup>b</sup>      | 1.0                      | 1.16 (0.99–1.35)   | 1.0                          | 1.11 (0.95–1.31)   | 1.0                      | 1.36 (0.99–1.89)   | 1.0                          | 0.89 (0.65–1.23)   |
| Multivariable HR <sup>c</sup> | 1.0                      | 1.16 (0.98–1.37)   | 1.0                          | 1.11 (0.93–1.32)   | 1.0                      | 1.32 (0.91–1.91)   | 1.0                          | 0.96 (0.65–1.41)   |

| Variable per outcome          | No diabetes              |                      |                              |                      | Diabetes                 |                      |                              |                      |
|-------------------------------|--------------------------|----------------------|------------------------------|----------------------|--------------------------|----------------------|------------------------------|----------------------|
|                               | Lp-PLA <sub>2</sub> mass |                      | Lp-PLA <sub>2</sub> activity |                      | Lp-PLA <sub>2</sub> mass |                      | Lp-PLA <sub>2</sub> activity |                      |
|                               | ≤75th <sup>a</sup>       | >75th <sup>a</sup>   | ≤75th <sup>a</sup>           | >75th <sup>a</sup>   | ≤75th <sup>a</sup>       | >75th <sup>a</sup>   | ≤75th <sup>a</sup>           | >75th <sup>a</sup>   |
| CVD outcome <sup>d</sup>      |                          |                      |                              |                      |                          |                      |                              |                      |
| Events ( <i>n</i> )           | 902                      | 337                  | 904                          | 335                  | 195                      | 70                   | 192                          | 73                   |
| Person-years                  | 30785                    | 9234                 | 30753                        | 9267                 | 3587                     | 1046                 | 3287                         | 1346                 |
| Adjusted HR <sup>b</sup>      | 1.0                      | 1.20 (1.06–<br>1.36) | 1.0                          | 1.18 (1.04–<br>1.34) | 1.0                      | 1.24 (0.93–<br>1.65) | 1.0                          | 0.94 (0.72–<br>1.24) |
| Multivariable HR <sup>c</sup> | 1.0                      | 1.19 (1.04–<br>1.37) | 1.0                          | 1.12 (0.97–<br>1.29) | 1.0                      | 1.24 (0.90–<br>1.71) | 1.0                          | 0.95 (0.69–<br>1.32) |

<sup>a</sup>Percentiles

<sup>b</sup>HR (95% CI), adjusted for age, sex and race

<sup>c</sup>HR (95% CI) adjusted for age, sex, race (black, non-black), BMI, smoking status (former, never, current), smoking history (lifetime pack-years), alcohol use (never, former, <7 drinks/week, >7 drinks/week), HDL, LDL, use of statins, C-reactive protein, field centre, education (lower than high school, high school or General Education Diploma (GED), higher than high school), physical activity (energy expenditure), creatinine and hypertension

<sup>d</sup>Any of the above (e.g. fatal CHD, fatal MI, non-fatal MI, CHF)
